# Supplementary material for: Racial Disparity in Cerebrospinal Fluid Amyloid and Tau Biomarkers and Associated Cutoffs for Mild Cognitive Impairment
Source: PubMed Central journal article supplement (PMC6991300; doi:10.1001/jamanetworkopen.2019.17363), 2019-12-13
Supplement: jamanetwopen-2-e1917363-s001.pdf [file jamanetwopen-2-e1917363-s001.pdf]

## Supplementary Online Content

Garrett SL, McDaniel D, Obideen M, et al. Racial disparity in cerebrospinal fluid amyloid and tau biomarkers and associated cutoffs for mild cognitive impairment. *JAMA Netw Open*. 2019;2(12):e1917363. doi:10.1001/jamanetworkopen.2019.17363

**eTable.** CSF Cutoffs for Maximal Discrimination Between Normal Cognition vs MCI by Race With Adjustment to Relevant Covariates

This supplementary material has been provided by the authors to give readers additional information about their work.

**eTable.** CSF Cutoffs for Maximal Discrimination Between Normal Cognition vs MCI by Race With Adjustment to Relevant Covariates

|                  |                         | <b>Adjusted</b> |             |             |      |      |
|------------------|-------------------------|-----------------|-------------|-------------|------|------|
| Race             | CSF                     | <b>Cutoff</b>   | Sensitivity | Specificity | PPV  | NPV  |
| African American | A $\beta$ 1-42          | <b>265</b>      | 0.88        | 0.65        | 0.77 | 0.8  |
|                  | Tau                     | <b>71</b>       | 0.77        | 0.77        | 0.82 | 0.71 |
|                  | Tau/ A $\beta$ 1-42     | <b>0.13</b>     | 0.79        | 0.77        | 0.83 | 0.73 |
|                  | Ptau181                 | <b>14</b>       | 0.91        | 0.63        | 0.77 | 0.83 |
|                  | Ptau181/ A $\beta$ 1-42 | <b>0.04</b>     | 0.7         | 0.83        | 0.85 | 0.67 |
| White            | A $\beta$ 1-42          | <b>193</b>      | 0.96        | 0.78        | 0.8  | 0.95 |
|                  | Tau                     | <b>28</b>       | 0.79        | 0.94        | 0.92 | 0.83 |
|                  | Tau/ A $\beta$ 1-42     | <b>0.12</b>     | 0.82        | 0.91        | 0.89 | 0.85 |
|                  | Ptau181                 | <b>13</b>       | 0.9         | 0.84        | 0.84 | 0.9  |
|                  | Ptau181/ A $\beta$ 1-42 | <b>0.06</b>     | 0.84        | 0.9         | 0.88 | 0.87 |

Adjusted Cutoffs were derived when the logistic regression model included age, sex, education, family history of AD, BMI, and MoCA score
